# Supplementary material for: Prediction of MHC class II binding affinity using SMM-align, a novel stabilization matrix alignment method
Source: PubMed Central journal article supplement (PMC1939856; doi:10.1186/1471-2105-8-238), 2007-07-04
Supplement: 1471-2105-8-238-S1.pdf [file 1471-2105-8-238-S1.pdf]

### Details of the benchmark calculation covering the 14 HLA-DR alleles.

| Pearson's correlation |       |       |          |        |         |       |         |          |      |
|-----------------------|-------|-------|----------|--------|---------|-------|---------|----------|------|
| Allele                | SMM   | Gibbs | TEPITOPE | SCRMHC | MHCpred | ARB   | SMM-PRF | NetMHCII | N    |
| 1*0101                | 0.423 | 0.317 | 0.186    | 0.130  | 0.158   | 0.409 | 0.449   | 0.451    | 1203 |
| 1*0301                | 0.500 | 0.426 | 0.052    |        |         | 0.500 | 0.461   | 0.463    | 474  |
| 1*0401                | 0.461 | 0.476 | 0.112    | 0.115  | 0.193   | 0.448 | 0.485   | 0.489    | 457  |
| 1*0404                | 0.479 | 0.418 | 0.115    |        |         | 0.521 | 0.492   | 0.459    | 168  |
| 1*0405                | 0.399 | 0.424 | 0.129    | 0.150  |         | 0.425 | 0.417   | 0.436    | 171  |
| 1*0701                | 0.491 | 0.359 | 0.086    |        | 0.301   | 0.417 | 0.506   | 0.522    | 310  |
| 1*0802                | 0.391 | 0.370 | 0.089    |        |         | 0.503 | 0.410   | 0.442    | 174  |
| 1*0901                | 0.399 | 0.380 |          |        |         | 0.444 | 0.443   | 0.454    | 117  |
| 1*1101                | 0.373 | 0.383 | 0.144    |        |         | 0.423 | 0.384   | 0.402    | 359  |
| 1*1302                | 0.568 | 0.395 | 0.432    |        |         | 0.750 | 0.589   | 0.583    | 179  |
| 1*1501                | 0.424 | 0.325 | 0.155    | 0.185  |         | 0.551 | 0.453   | 0.459    | 365  |
| 3*0101                | 0.198 | 0.130 |          |        |         | 0.277 | 0.240   | 0.340    | 102  |
| 4*0101                | 0.447 | 0.440 |          |        |         | 0.513 | 0.433   | 0.428    | 181  |
| 5*0101                | 0.332 | 0.301 | 0.123    | 0.207  |         | 0.322 | 0.336   | 0.338    | 343  |

| Spearman's rank correlation |       |       |          |        |         |       |         |          |      |
|-----------------------------|-------|-------|----------|--------|---------|-------|---------|----------|------|
| Allele                      | SMM   | Gibbs | TEPITOPE | SVRHMM | MHCpred | ARB   | SMM-PRF | NetMHCII | N    |
| 1*0101                      | 0.392 | 0.260 | 0.333    | 0.213  | 0.146   | 0.376 | 0.417   | 0.413    | 1203 |
| 1*0301                      | 0.507 | 0.453 | 0.227    |        |         | 0.506 | 0.441   | 0.466    | 474  |
| 1*0401                      | 0.468 | 0.482 | 0.508    | 0.461  | 0.176   | 0.434 | 0.495   | 0.499    | 457  |
| 1*0404                      | 0.509 | 0.433 | 0.609    |        |         | 0.529 | 0.529   | 0.481    | 168  |
| 1*0405                      | 0.401 | 0.428 | 0.542    | 0.409  |         | 0.420 | 0.400   | 0.417    | 171  |
| 1*0701                      | 0.491 | 0.353 | 0.460    |        | 0.309   | 0.410 | 0.509   | 0.531    | 310  |
| 1*0802                      | 0.411 | 0.375 | 0.472    |        |         | 0.517 | 0.442   | 0.461    | 174  |
| 1*0901                      | 0.430 | 0.398 |          |        |         | 0.440 | 0.477   | 0.487    | 117  |
| 1*1101                      | 0.390 | 0.385 | 0.382    |        |         | 0.421 | 0.406   | 0.426    | 359  |
| 1*1302                      | 0.578 | 0.400 | 0.411    |        |         | 0.763 | 0.595   | 0.594    | 179  |
| 1*1501                      | 0.422 | 0.305 | 0.453    | 0.481  |         | 0.561 | 0.453   | 0.461    | 365  |
| 3*0101                      | 0.252 | 0.232 |          |        |         | 0.276 | 0.302   | 0.357    | 102  |
| 4*0101                      | 0.420 | 0.417 |          |        |         | 0.507 | 0.412   | 0.403    | 181  |
| 5*0101                      | 0.356 | 0.288 | 0.313    | 0.322  |         | 0.330 | 0.346   | 0.347    | 343  |

**Supplementary Table 1.** The predictive performance is shown in terms of the Pearson's correlation (upper table) and the Spearman's rank correlation (lower table) for the SMM-align, Gibbs sampler [1], TEPITOPE [2], SVRMHC [3], MHCpred [4], and ARB methods, respectively. The SMM-PRF method refers to the extended SMM-align method including penalties for long peptides and short amino terminal peptide flanking residues, and the *NetMHCII* method refers to the final extended SMM align method including direct encoding of peptide flanking residues and penalties for longer peptides and short amino terminal peptide flanking residues. The first column gives the allele names as 1\*0101 for DRB1\*0101 etc.. The last column gives the number of peptide data included for each allele. For each allele, the performance of the SMM-align, Gibbs sampler, and *NetMHCII* methods was estimated using five-fold cross-validation as described in the text.
