# Supplementary material for: 65)術後橋本脳症による遷延性意識障害を来した大動脈弁狭窄症の1例(日本循環器学会第126回東海・第111回北陸合同地方会)
Source: Springer Nature journal article supplement (doi:10.1186/1471-2105-8-238), 2006-04-20
Supplement: 12859_2007_1610_MOESM5_ESM.pdf [file 12859_2007_1610_MOESM5_ESM.pdf]

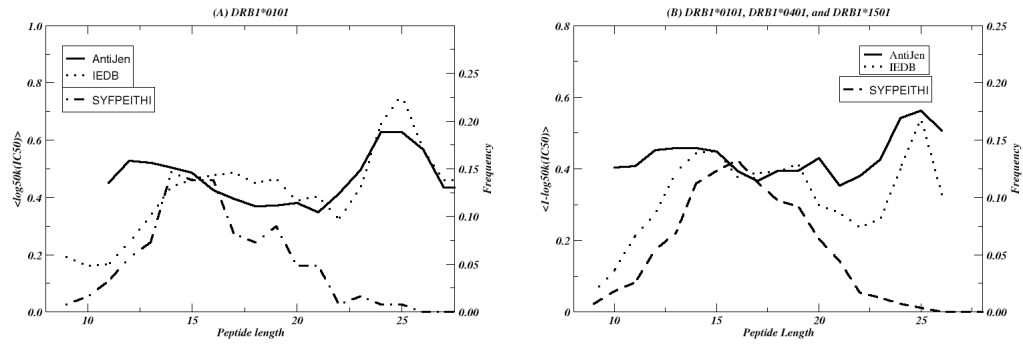

**Figure 3. MHC-II binding affinity as a function of peptide length for three MHC-II alleles, DRB1\*0101, DRB1\*0401, and DRB1\*1501. In a) results for the DRB1\*0101 allele are displayed, and b) shows an average over the 3 alleles. For each data set, the mean binding affinity for peptides of a given length is shown as a function of the peptide length. In black is shown the curves for the data in the AntiJen data set [5]. In red is shown the curves for the data in the IEDB data set [13]. The green curves show histograms of the length distribution of natural MHC ligands as downloaded from the SYFPEITHI database [20]. As suggested by Cheng et al., values for peptide lengths where no affinity data are available are set to the mean binding value over the entire data set. All curves are smoothed using a running mean of length three.**
