# Supplementary material for: 65)術後橋本脳症による遷延性意識障害を来した大動脈弁狭窄症の1例(日本循環器学会第126回東海・第111回北陸合同地方会)
Source: Springer Nature journal article supplement (doi:10.1186/1471-2105-8-238), 2006-04-20
Supplement: 12859_2007_1610_MOESM6_ESM.pdf [file 12859_2007_1610_MOESM6_ESM.pdf]

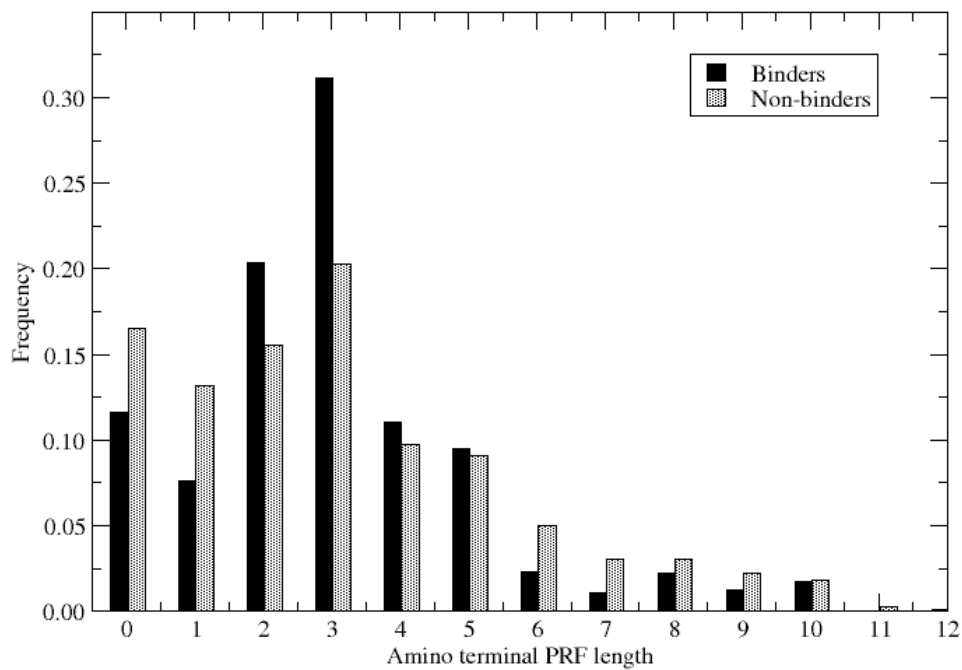

**Figure 4. Length distribution of amino terminal PFR for MHC-II binding and non-binding peptides. All peptide data for the three alleles in the AntiJen and IEDB data sets are included in the figure. Binding peptides have an affinity stronger than 50 nM. The PFR is defined, as the residues flanking the peptide-binding core as determined by the SMM-align method.**
