# Supplementary material for: 65)術後橋本脳症による遷延性意識障害を来した大動脈弁狭窄症の1例(日本循環器学会第126回東海・第111回北陸合同地方会)
Source: Springer Nature journal article supplement (doi:10.1186/1471-2105-8-238), 2006-04-20
Supplement: 12859_2007_1610_MOESM7_ESM.pdf [file 12859_2007_1610_MOESM7_ESM.pdf]

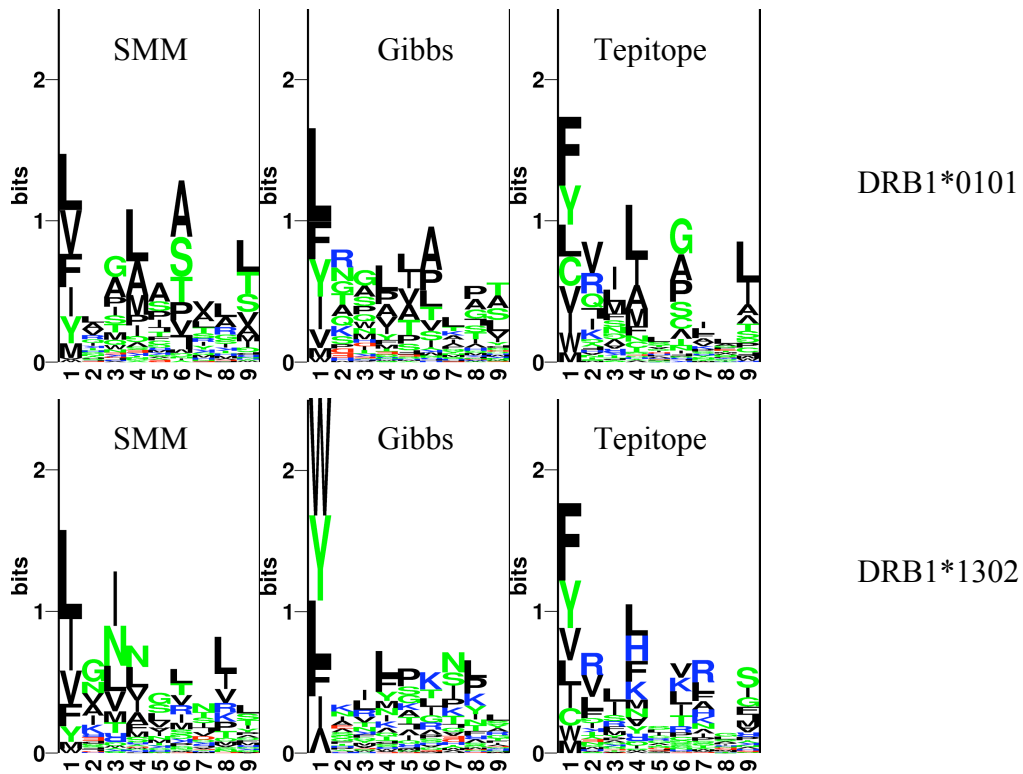

**Figure 5. Kullback-Leibler logo visualizations of peptide binding motifs. The upper panel depicts the motif for the DRB1\*0101 allele, and the lower panel the motif for the DRB1\*1302 alleles. From left the different columns show the motif estimated by the SMM-align, Gibbs sample, and TEPITOPE methods, respectively. The height of a column in the logo is proportional to the relative information content in the sequence motif, and the letter height is proportional to the amino acid frequency [22].**
